# Supplementary material for: Mice gut microbiota programming by using the infant food profile. The effect on growth, gut microbiota and the immune system
Source: Royal Society of Chemistry journal article supplement (doi:10.1039/c7fo00819h), 2017-01-01
Supplement: c7fo00819h1.pdf [file c7fo00819h1.pdf]

## 1 Supplementary information

2 **Table 1.** List of ingredients in descending order.

| <b>Baby Food Jar</b> | <b>Ingredients</b>                                                                                                                        |
|----------------------|-------------------------------------------------------------------------------------------------------------------------------------------|
| BFJ-A                | cooking water, chicken meat 20%, rice 9%, cornstarch, lemon juice, olive oil 0.6%, salt.                                                  |
| BFJ-B                | cooking water, chicken meat 15%, rice 6%, carrots, cornstarch, tomato, onion, olive oil 0.8%, vegetable oils (unspecified), celery, salt. |

3
